## ABSTRACT

Polycystic ovary syndrome (PCOS) is a growing worldwide public health problem that affects millions of women in their reproductive age. Despite being a very common disorder among women, there are still gaps regarding knowledge of disease mechanisms. In this respect, it was recently reported that acetaldehyde (ACD) is endogenously formed during normal ovarian steroidogenesis. The researchers demonstrated that in physiological concentrations ACD caused no detrimental effect on ovarian tissue. Contrariwise, in supraphysiological levels, ACD impairs granulosa cell differentiation, reduces ovulation, and decreases oocyte quality. Gut microbiota of patients with nonalcoholic fatty liver disease (NAFLD) produces significant quantities of endogenous ethanol (EE) and ACD. Because PCOS is closely linked to NAFLD, an ethanol-producing disorder, we hypothesize that it can be an endogenous alcoholic polycystic ovary syndrome (EAPCOS). The main findings of this study were that (i) the odds ratio of having polycystic ovaries is 30-fold greater in alcohol-exposed women than among unexposed controls; (ii) NAFLD/PCOS patients produce gonadotoxic quantities of EE; (iii) NAFLD/PCOS and alcoholic hepatitis individuals share similar liver expression levels of genes regulating high-km ethanol-metabolizing enzymes; (iv) NAFLD/PCOS and alcohol-tolerant drinkers share similar high-capacity to metabolize ethanol in the gut-liver axis; and (v) low blood alcohol concentration (BAC) in NAFLD/PCOS and alcohol-tolerant individuals stem from extensive alcohol degradation in gut-liver axis and significant fecal loss of ethanol. In summary, we provide mechanistic insights supporting the hypothesis that PCOS can be indeed an EAPCOS.

## INTRODUCTION

Polycystic ovary syndrome (PCOS) is the most common cause of anovulatory infertility in women over its reproductive lifetime [1]. Available data indicate that PCOS is closely linked to obesity, insulin resistance, and nonalcoholic fatty liver disease (NAFLD) [2,3]. This suggests that these conditions share a common etiological background.

A striking feature of patients with NAFLD and, by extension with PCOS, is to produce significantly more endogenous ethanol (EE) than controls [4–6]. Accordingly, it is believed that EE plays a critical role in NAFLD development and progression [7–9]. From these observations, we hypothesize that EE also may play a causative role in PCOS pathogenesis.

It is no novelty the intriguing idea about the existence of an endogenous alcoholic disease. Early researchers attempting to validate this hypothesis have provided disappointing results. This discouraged further investigation regarding this matter for several decades. Firstly, because blood-alcohol concentration (BAC) following jejunoileal bypass was significantly lower than in alcoholics, it was concluded that the quantity of EE was insufficient to elicit liver injury [10]. Secondly, since liver histology was normal in a rat model of small intestinal bacterial overgrowth (SIBO), it was inferred that gut bacteria are unable to produce hepatotoxic amounts of ethanol [11]. However, Sprague-Dawley strains only develop steatohepatitis and fibrosis 12 to 14 weeks after study initiation. And in this study, the rodents were sacrificed very early, around the 4th to 5th weeks of experimentation [12]. Therefore, as this mouse model recapitulates the histopathological spectrum of human alcoholic liver disease, we postulate that it can also cause polycystic ovaries.

73     Thus, the main focus of this study was to provide a mechanistic explanation of how  
74     PCOS may be an endogenous alcoholic polycystic ovary syndrome (EAPCOS).

75

76

77

78

79

80

81

82

83

84

85

86

87

88

89

90

91

## 92 **Ethanol is a prodrug**

93 As a prodrug, ethanol requires conversion to ACD in order to exert its cytotoxic  
94 properties [13,14]. This pharmacokinetic characteristic of ethanol is of paramount  
95 importance for a mechanistic understanding of the EAPCOS hypothesis. The clear and  
96 obvious implication of this is that in a scenario of extensive presystemic catabolism of  
97 ethanol, BACs can be negligible or even undetectable. The finding that intravenous  
98 infusion of cirrhotogenic amounts of ethanol (57.6 to 115.2 g/d) in alcohol-tolerant  
99 drinkers induces only modest BACs (1.5 to 4.5 mg/dL) supports this notion [15].

100

## 101 **Gastrointestinal production and degradation of ethanol**

102 Gastrointestinal microbiota of healthy subjects produces nontoxic amounts of EE from  
103 luminal dietary carbohydrates. Next, EE is absorbed and metabolized in the liver to  
104 ACD, which in turn is oxidized to non-toxic amounts of acetate [16]. In contrast, in  
105 SIBO-related conditions such as NAFLD/PCOS [17][18] and malabsorption syndromes  
106 [19], gut production of EE is significantly greater than in controls [4–6]. Agreeing with  
107 this, gut/fecal concentrations of EE in these cases are proportionally equal to or even  
108 greater than those obtained after moderate drinking [19–21] As ethanol is formed within  
109 a dysbiotic gut, it is converted to ACD in a dose- and concentration-dependent manner  
110 [11]. In this setting, ACD-producing alcohol dehydrogenase (ADH) activity is higher  
111 than that of ACD-oxidizing aldehyde dehydrogenase (ALDH) [22]. The net result is  
112 ACD build-up coupled with low BACs. However, in the auto-brewery syndrome,  
113 massive production of EE exceeds gut-liver axis ability to clear alcohol from  
114 circulation. As a consequence, BAC may reach 250-350 mg/dL [23].

115 Blind-loop contents of rat jejunum converts ethanol to ACD at a rate of 1.99  $\mu\text{M}/\text{min} \cdot$   
 116 mL under aerobic conditions [11]. If applicable to patients with SIBO and small bowel  
 117 contents around 2000 mL, it is estimated that everyone can convert ~528 g of EE into  
 118 ACD daily. Experimentally it has been demonstrated that extrahepatic ACD is 30 to  
 119 330-fold more hepatotoxic than that formed intrahepatically [24,25]. Extrapolating this  
 120 to humans, 0.18-2 g of EE will provide an amount of ACD as hepatotoxic as that  
 121 generated intrahepatically from a cirrhotogenic dose of 60 g ethanol [26].

122 BACs found in NAFLD/PCOS as well as in alcohol-tolerant subjects are consistently  
 123 low [15,27]. In this scenario, for maintaining a steady-state BAC of 7.14 mg/dL [27]  
 124 NAFLD/PCOS patients would need a 24-h continuous intravenous infusion of ethanol  
 125 at a rate ~9.5 g/h (228 g/day) [28].

126 Lastly, a seminal study showed up-regulation of all genes involved in ethanol  
 127 metabolism in nonalcoholic steatohepatitis livers [5]. Importantly, these genes encode  
 128 enzymes whose maximal catalytic activities are at high ethanol concentrations [29]. Even  
 129 more noteworthy is the finding that hepatic expression of ethanol-metabolizing genes in  
 130 NAFLD/PCOS is similar to that of alcoholic hepatitis [7].

131

### 132 **Ethanol pharmacokinetics in NAFLD/PCOS is similar to that of alcohol-tolerant** 133 **individuals**

134 Blood-alcohol elimination rate may be 3-fold to 4-fold higher in alcohol-tolerant than in  
 135 healthy individuals and social drinkers [29]. Causative factors include induction of  
 136 high- $K_m$  alcohol-metabolizing enzymes by ethanol, insulin resistance, ketone bodies,  
 137 unsaturated fatty acids [30], iron overload [31], hyperglycemia [32], and gut microbial  
 138 degradation of ethanol [11]. Additionally, genetic polymorphisms of alcohol-

139 metabolizing enzymes play an essential role in the development of this so-called alcohol  
140 tolerance/adaptation process [33,34]. In this setting, instead of metabolizing ethanol in  
141 milligram levels through ADH1 activity, the individual starts doing this at tens of grams  
142 scale via CYP2E1, catalase, ADH3, and ADH4 [30,35–37] For example, for maintaining  
143 a steady-state BAC between 1.5 to 4.5 mg/dL, alcohol-tolerant individuals require a  
144 continuous intravenous infusion of ethanol at a rate equivalent to 57.6 to 115.2 g/d [15].

145 Interestingly, and probably not by chance, all these risk factors for increased blood-  
146 alcohol clearance are also present in NAFLD/PCOS [5,38–40]. For this reason, it is  
147 intuitive to infer that patients with NAFLD/PCOS metabolize exogenous/endogenous  
148 ethanol similarly to alcohol-tolerant individuals (Figure). In line with this argument, (i)  
149 aberrant microbiota found in NAFLD as well as in alcoholics consists of both ethanol-  
150 producing and -degrading bacteria [4,41,42], (ii) gut production and degradation of  
151 ethanol are dose-dependent and simultaneous processes that prevent high BAC  
152 [11,19,43,44], and (iii) gut concentrations of ACD reach mutagenic values (49-87  $\mu$ M)  
153 in rat blind loops [11]. Furthermore, impaired gastrointestinal absorption [45–48] and  
154 binding/entrapment of alcohol in food constituents certainly contribute to low BACs  
155 [47,49]. Notably, fecal loss of ethanol reaches concentration values up to 50-fold greater  
156 than BACs found in NAFLD [19][27].

157

# **158 Calculating EE production from a standard human pharmacokinetic model**

159 One study showed that average BAC of twenty patients with NAFLD was 7.14 mg/dL  
160 after a 12h overnight fast [27]. Assuming that ethanol elimination rate of these  
161 individuals was 20 mg/dL/h and that its mean height was 1.74 m, we estimate the  
162 amount of EE produced by each patient. To achieve this, we use a validated

163 physiologically-based model of alcohol metabolism, which has been described in detail  
164 elsewhere [28]. According to our calculations, each patient produced 161.49 g of EE  
165 after a 12-h overnight fast. By extrapolating the data to three equicaloric meals, the  
166 daily production of EE should reach 484 g. Because EE undergoes extensive conversion  
167 to ACD in the gut-liver axis, estimated total circulating alcohol burden is only 4.6 g.  
168 This leads to the characteristically low BAC found in these patients (see [28] for  
169 equations and calculation procedures).

### 170 **Ovariotoxicity of ethanol**

171 It has been shown that endogenous ACD is formed as a byproduct during normal  
172 ovarian steroidogenesis [50]. In this situation, there is no ovotoxicity because it  
173 converted to acetate by ovarian ALDH. On the contrary, in supraphysiological  
174 concentrations, ACD disrupts the differentiation of granulosa cells, reduces ovulation  
175 and lowers oocyte quality [50]. Acute as well as chronic exposure to ethanol inhibits  
176 ovarian steroidogenic acute regulatory protein (StAR), which plays a crucial role in  
177 gonadotropin-stimulated gonadal hormone production [51,52]. This leads to an increase  
178 in the number of the corpora lutea, atretic follicles, regression of theca antral follicles,  
179 vacuolation/fat deposition in granulosa, theca, and interstitial cells [53]. As a result,  
180 alcohol exposure entails disruption of puberty and menstrual cycling as well as a  
181 hormonal imbalance in pre and postmenopausal women [54].

182 Agreeing with these observations, the odds ratio of having PCOS is about 30-fold  
183 higher among Chinese women consuming alcohol than in matched controls [55]. This  
184 substantial discrepancy is because 30% to 40% of Asian individuals carry out a  
185 defective ALDH2 enzyme, providing the accumulation of very high quantities of ACD  
186 [56,57]. Moreover, subgroup analyses of multiple subpopulations suggest a positive



187 relationship between heavy alcohol intake and ovarian cancer [58]. Supporting  
188 argument for this epidemiological connection comes from the finding of elevated  
189 concentrations of ACD in ovarian cancer tissues [59].

190

## 191 **Other endogenous and exogenous risk factors for PCOS**

192 According to the data presented here, ethanol itself recapitulates the entire phenotype of  
193 PCOS. However, other endogenous/exogenous toxins may be implicated in its  
194 pathogenesis. These include dicarbonyl compounds [60–62], advanced glycation end  
195 products (AGEs) [63,64], advanced lipid peroxidation end products (ALEs) [65,66] and  
196 nitric oxide radicals [67]. Furthermore, it is possible that epigenetic changes and  
197 aberrant microRNA (miRNA) may play a relevant role in PCOS development [68,69].  
198 Considering that NAFLD/PCOS is an alcohol-producing disorder, we postulate that  
199 even alcohol-abstinent women are at increased risk of developing ovarian cancer. This  
200 event would be particularly likely among NAFLD/PCOS patients carrying genetic  
201 susceptibility to both sporadic and hereditary ovarian neoplasms [70,71]. Likewise,  
202 NAFLD/PCOS women carrying functional polymorphisms in ethanol-metabolizing  
203 genes may be at highest risk for developing ovarian cancer and other alcohol-related  
204 neoplasms [72,73].

205

## 206 **Conclusion**

207 In short, our data reconcile the apparently contradictory association between exposure to  
208 large amounts of ethanol concurrently with negligible BACs [15]. The EAPCOS  
209 hypothesis contains several limitations, including the fact that most of the evidence

210 comes from uncontrolled observational studies. Nevertheless, it provides sufficient  
 211 evidence justifying the existence of an EAPCOS. Lastly, if confirmed by further studies,  
 212 our hypothesis may contribute to novel therapeutic and preventive strategies for disease  
 213 management and control.

214

215 Author's roles

216 I.C.M. elaborated the study's hypothesis and purpose, performed the literature search,  
 217 wrote and critically reviewed and approved the final version of the paper; J.G.L.  
 218 contributed to the study design, figure elaboration, paper editing, and critically reviewed  
 219 and approved the final version of the manuscript.

220

221

222

223

224

225

226

227

228

229

## 230 REFERENCES

- 231 [1] Costello MF, Ledger WL. Evidence-based lifestyle and pharmacological  
232 management of infertility in women with polycystic ovary syndrome. *Womens*  
233 *Health (Lond Engl)* 2012;8:277–90. doi:10.2217/whe.12.14.
- 234 [2] Baranova A, Tran TP, Birerdinc A, Younossi ZM. Systematic review: association  
235 of polycystic ovary syndrome with metabolic syndrome and non-alcoholic fatty  
236 liver disease. *Aliment Pharmacol Ther* 2011;33:801–14. doi:10.1111/j.1365-  
237 2036.2011.04579.x.
- 238 [3] Ollila M-M, Piltonen T, Puukka K, Ruukonen A, Järvelin M-R, Tapanainen JS,  
239 et al. Weight Gain and Dyslipidemia in Early Adulthood Associate with  
240 Polycystic Ovary Syndrome: Prospective Cohort Study. *J Clin Endocrinol Metab*  
241 2015;101:jc20153543. doi:10.1210/jc.2015-3543.
- 242 [4] Zhu L, Baker SS, Gill C, Liu W, Alkhouri R, Baker RD, et al. Characterization of  
243 gut microbiomes in nonalcoholic steatohepatitis (NASH) patients: a connection  
244 between endogenous alcohol and NASH. *Hepatology* 2013;57:601–9.  
245 doi:10.1002/hep.26093.
- 246 [5] Baker SS, Baker RD, Liu W, Nowak NJ, Zhu L. Role of alcohol metabolism in  
247 non-alcoholic steatohepatitis. *PLoS One* 2010;5:e9570.  
248 doi:10.1371/journal.pone.0009570.
- 249 [6] Nair S, Cope K, Risby TH, Diehl AM, Terence RH. Obesity and female gender  
250 increase breath ethanol concentration: potential implications for the pathogenesis  
251 of nonalcoholic steatohepatitis. *Am J Gastroenterol* 2001;96:1200–4.  
252 doi:10.1111/j.1572-0241.2001.03702.x.

- 253 [7] Zhu R, Baker SS, Moylan CA, Abdelmalek MF, Guy CD, Zamboni F, et al.  
254 Systematic Transcriptome Analysis Reveals Elevated Expression of Alcohol  
255 Metabolizing Genes in NAFLD Livers. J Pathol 2015;238:531–42.  
256 doi:10.1002/path.4650.
- 257 [8] Aljomah G, Baker SS, Liu W, Kozielski R, Oluwale J, Lupu B, et al. Induction  
258 of CYP2E1 in non-alcoholic fatty liver diseases. Exp Mol Pathol 2015;99:677–  
259 81. doi:10.1016/j.yexmp.2015.11.008.
- 260 [9] Aljomah G, Baker SS, Liu W, Kozielski R, Baker RD, Zhu L. Genes of Alcohol  
261 Metabolism in Patients With Simple Steatosis and NASH. Gastroenterology  
262 2015;146:S-763-S-764. doi:10.1016/S0016-5085(14)62759-1.
- 263 [10] Mezey E, Imbembo AL, Potter JJ, Rent KC, Lombardo R, Holt PR. Endogenous  
264 ethanol production and hepatic disease following jejunoileal bypass for morbid  
265 obesity. Am J Clin Nutr 1975;28:1277–83.
- 266 [11] Baraona E, Julkunen R, Tannenbaum L, Lieber CS. Role of intestinal bacterial  
267 overgrowth in ethanol production and metabolism in rats. Gastroenterology  
268 1986;90:103–10.
- 269 [12] Lichtman SN, Sartor RB, Keku J, Schwab JH. Hepatic inflammation in rats with  
270 experimental small intestinal bacterial overgrowth. Gastroenterology  
271 1990;98:414–23.
- 272 [13] Faut M, Rodríguez de Castro C, Bietto FM, Castro JA, Castro GD. Metabolism  
273 of ethanol to acetaldehyde and increased susceptibility to oxidative stress could  
274 play a role in the ovarian tissue cell injury promoted by alcohol drinking. Toxicol  
275 Ind Health 2009;25:525–38. doi:10.1177/0748233709345937.

- 276 [14] Meskar A, Holownia A, Bardou LG, Menez JF. Effect of acetaldehyde generated  
277 from ethanol by ADH-transfected CHO cells on their membrane fatty acid  
278 profiles. Alcohol 1996;13:611–6. doi:10.1016/s0741-8329(96)00076-6.
- 279 [15] Lands WE. A review of alcohol clearance in humans. Alcohol 1998;15:147–60.  
280 doi:10.1016/s0741-8329(97)00110-9.
- 281 [16] Krebs HA, Perkins JR. The physiological role of liver alcohol dehydrogenase.  
282 Biochem J 1970;118:635–44. doi:10.1042/bj1180635.
- 283 [17] Ferolla SM, Armiliato GNA, Couto CA, Ferrari TCA. The Role of Intestinal  
284 Bacteria Overgrowth in Obesity-Related Nonalcoholic Fatty Liver Disease.  
285 Nutrients 2014;6:5583–99. doi:10.3390/nu6125583.
- 286 [18] Kapil S, Duseja A, Sharma BK, Singla B, Chakraborti A, Das A, et al. Small  
287 intestinal bacterial overgrowth and toll like receptor signaling in patients with  
288 nonalcoholic fatty liver disease. J Gastroenterol Hepatol 2016;31:213–21.  
289 doi:10.1111/jgh.13058.
- 290 [19] Picot D, Lauvin R, Hellegouarc’h R. [Intra-digestive fermentation in intestinal  
291 malabsorption syndromes: relations with elevated serum activity of gamma-  
292 glutamyl-transpeptidase]. Gastroenterol Clin Biol 1997;21:562–6. doi:GCB-08-  
293 1997-21-8-9-0399-8320-101019-ART71.
- 294 [20] Klipstein FA, Holdeman L V, Corcino JJ, Moore WE. Enterotoxigenic intestinal  
295 bacteria in tropical sprue. Ann Intern Med 1973;79:632–41. doi:10.7326/0003-  
296 4819-79-5-632.
- 297 [21] Halsted CH, Robles EA, Mezey E. Distribution of ethanol in the human  
298 gastrointestinal tract. Am J Clin Nutr 1973;26:831–4.

- 299 [22] Pronko P, Bardina L, Satanovskaya V, Kuzmich A, Zimatkin S. Effect of chronic  
300 alcohol consumption on the ethanol- and acetaldehyde-metabolizing systems in  
301 the rat gastrointestinal tract. *Alcohol Alcohol* 2002;37:229–35.  
302 doi:10.1093/alcalc/37.3.229.
- 303 [23] Dahshan A, Donovan K. Auto-brewery syndrome in a child with short gut  
304 syndrome: case report and review of the literature. *J Pediatr Gastroenterol Nutr*  
305 2001;33:214–5. doi:10.1097/00005176-200108000-00024.
- 306 [24] Bankowski E, Pawlicka E, Sobolewski K. Liver collagen of rats submitted to  
307 chronic intoxication with acetaldehyde. *Mol Cell Biochem* 1993;121:37–43.  
308 doi:10.1007/bf00928698.
- 309 [25] Matysiak-Budnik T, Jokelainen K, Kärkkäinen P, Mäkisalo H, Ohisalo J,  
310 Salaspuro M. Hepatotoxicity and absorption of extrahepatic acetaldehyde in rats.  
311 *J Pathol* 1996;178:469–74. doi:10.1002/(SICI)1096-  
312 9896(199604)178:4<469::AID-PATH510>3.0.CO;2-9.
- 313 [26] O’Shea RS, Dasarathy S, McCullough AJ. Alcoholic liver disease. *Am J*  
314 *Gastroenterol* 2010;105:14–32. doi:10.1038/ajg.2009.593.
- 315 [27] Menezes CN, Raal F, Immelman A, Song E. The role of increased  
316 gastrointestinal alcohol production in patients with the metabolic syndrome:  
317 Implications for the pathogenesis of non-alcoholic fatty liver disease. *J*  
318 *Endocrinol Metab Diabetes South Africa* 2008;13:48–56.  
319 doi:10.1080/22201009.2008.10872170.
- 320 [28] Medeiros IC de, de Lima JG. Is nonalcoholic fatty liver disease an endogenous  
321 alcoholic fatty liver disease? - A mechanistic hypothesis. *Med Hypotheses*

- 2015;85:148–52. doi:10.1016/j.mehy.2015.04.021.
- [29] Cederbaum AI. Alcohol metabolism. Clin Liver Dis 2012;16:667–85.  
doi:10.1016/j.cld.2012.08.002.
- [30] Leung T-M, Nieto N. CYP2E1 and oxidant stress in alcoholic and non-alcoholic  
fatty liver disease. J Hepatol 2012;58:395–8. doi:10.1016/j.jhep.2012.08.018.
- [31] Cederbaum AI. Iron and CYP2E1-dependent oxidative stress and toxicity.  
Alcohol 2003;30:115–20.
- [32] Swaminathan K, Kumar SM, Clemens DL, Dey A. Inhibition of CYP2E1 leads  
to decreased advanced glycated end product formation in high glucose treated  
ADH and CYP2E1 over-expressing VL-17A cells. Biochim Biophys Acta  
2013;1830:4407–16. doi:10.1016/j.bbagen.2013.05.022.
- [33] Oshima S, Haseba T, Nemoto A, Siiya S, Kanda T, Ohno Y. Effect of ALDH2  
Genetic Polymorphism on the Adaptive Change in Alcohol Metabolism Due to  
Continuous Moderate Alcohol Consumption in Humans. Food Nutr Sci  
2015;6:195–204. doi:10.4236/fns.2015.62020.
- [34] Bosron WF, Li T-K. Genetic polymorphism of human liver alcohol and aldehyde  
dehydrogenases, and their relationship to alcohol metabolism and alcoholism.  
Hepatology 1986;6:502–10. doi:10.1002/hep.1840060330.
- [35] Haseba T, Ohno Y. A new view of alcohol metabolism and alcoholism--role of  
the high-Km Class III alcohol dehydrogenase (ADH3). Int J Environ Res Public  
Health 2010;7:1076–92. doi:10.3390/ijerph7031076.
- [36] Lieber CS. CYP2E1: from ASH to NASH. Hepatol Res 2004;28:1–11.

- 344 [37] Lieber CS. Alcoholic fatty liver: its pathogenesis and mechanism of progression  
345 to inflammation and fibrosis. *Alcohol* 2004;34:9–19.  
346 doi:10.1016/j.alcohol.2004.07.008.
- 347 [38] Yang S-L, Xia J-H, Zhang Y-Y, Fan J-G, Wang H, Yuan J, et al.  
348 Hyperinsulinemia shifted energy supply from glucose to ketone bodies in early  
349 nonalcoholic steatohepatitis from high-fat high-sucrose diet induced Bama  
350 minipigs. *Sci Rep* 2015;5:13980. doi:10.1038/srep13980.
- 351 [39] Puri P, Wiest MM, Cheung O, Mirshahi F, Sargeant C, Min HK, et al. The  
352 plasma lipidomic signature of nonalcoholic steatohepatitis. *Hepatology*  
353 2009;50:1827–38. doi:10.1002/hep.23229.
- 354 [40] Birkenfeld AL, Shulman GI. Nonalcoholic fatty liver disease, hepatic insulin  
355 resistance, and type 2 diabetes. *Hepatology* 2014;59:713–23.  
356 doi:10.1002/hep.26672.
- 357 [41] Tsuruya A, Kuwahara A, Saito Y, Yamaguchi H, Tenma N, Inai M, et al. Major  
358 Anaerobic Bacteria Responsible for the Production of Carcinogenic  
359 Acetaldehyde from Ethanol in the Colon and Rectum. *Alcohol Alcohol*  
360 2016;51:395–401. doi:10.1093/alcalc/agv135.
- 361 [42] Bode JC, Bode C, Heidelberg R, Durr HK, Martini GA. Jejunal microflora in  
362 patients with chronic alcohol abuse. *Hepatogastroenterology* 1984;31:30–4.
- 363 [43] Jokelainen K, Matysiak-Budnik T, Mäkisalo H, Höckerstedt K, Salaspuro M.  
364 High intracolonic acetaldehyde values produced by a bacteriocolonial pathway for  
365 ethanol oxidation in piglets. *Gut* 1996;39:100–4. doi:10.1136/gut.39.1.100.
- 366 [44] Nosova T, Jokelainen K, Kaihovaara P, Heine R, Jousimies-Somer H, Salaspuro



- 367 M. Characteristics of aldehyde dehydrogenases of certain aerobic bacteria  
368 representing human colonic flora. *Alcohol Alcohol* 1998;33:273–80.
- 369 [45] Jackson SJ, Leahy FE, McGowan AA, Bluck LJC, Coward WA, Jebb SA.  
370 Delayed gastric emptying in the obese: an assessment using the non-invasive  
371 <sup>13</sup>C-octanoic acid breath test. *Diabetes, Obes Metab* 2004;6:264–70.  
372 doi:10.1111/j.1462-8902.2004.0344.x.
- 373 [46] Paton A. Alcohol in the body. *BMJ* 2005;330:85–7.  
374 doi:10.1136/bmj.330.7482.85.
- 375 [47] Jones AW, Jönsson KA, Kechagias S. Effect of high-fat, high-protein, and high-  
376 carbohydrate meals on the pharmacokinetics of a small dose of ethanol. *Br J Clin*  
377 *Pharmacol* 1997;44:521–6.
- 378 [48] Roland BC, Ciarleglio MM, Clarke JO, Semler JR, Tomakin E, Mullin GE, et al.  
379 Small Intestinal Transit Time Is Delayed in Small Intestinal Bacterial  
380 Overgrowth. *J Clin Gastroenterol* 2015;49:571–6.  
381 doi:10.1097/MCG.0000000000000257.
- 382 [49] Oshima S. Water-insoluble fractions of botanical foods lower blood ethanol  
383 levels in rats by physically maintaining the ethanol solution after ethanol  
384 administration. *Funct Foods Heal Dis* 2015;5:406–16.
- 385 [50] Kawai T, Mihara T, Kawashima I, Fujita Y, Ikeda C, Negishi H, et al.  
386 Endogenous acetaldehyde toxicity during antral follicular development in the  
387 mouse ovary. *Reprod Toxicol* 2012;33:322–30.  
388 doi:10.1016/j.reprotox.2012.01.001.
- 389 [51] Srivastava VK, Hiney JK, Dearth RK, Les Dees W. Acute effects of ethanol on

- steroidogenic acute regulatory protein (StAR) in the prepubertal rat ovary.  
Alcohol Clin Exp Res 2001;25:1500–5. doi:10.1097/00000374-200110000-00014.
- [52] Srivastava VK, Hiney JK, Dearth RK, Les Dees W. Chronic effects of prepubertal ethanol administration on steroidogenic acute regulatory protein in the rat ovary. Alcohol Clin Exp Res 2002;26:107–13.
- [53] Laura IA, Martinez M, Padovani CR, Martinez FE. Ultrastructural and morphometric analysis on the ovary of Wistar rats after chronic ethanol ingestion. J Submicrosc Cytol Pathol 2003;35:167–76.
- [54] Emanuele MA, Wezeman F, Emanuele N V, Ph D. Alcohol's effects on female reproductive function. Alcohol Res Heal J Natl Inst Alcohol Abus Alcohol 2002;26:274–81.
- [55] Zhang J, Liu XF, Liu Y, Xu LZ, Zhou LL, Tang LL, et al. Environmental risk factors for women with polycystic ovary syndrome in china: a population-based case-control study. J Biol Regul Homeost Agents 2014;28:203–11.
- [56] Ginsberg G, Smolenski S, Hattis D, Sonawane B. Population distribution of aldehyde dehydrogenase-2 genetic polymorphism: implications for risk assessment. Regul Toxicol Pharmacol 2002;36:297–309.
- [57] Brooks PJ, Zakhari S. Acetaldehyde and the genome: Beyond nuclear DNA adducts and carcinogenesis. Env Mol Mutagen 2013. doi:10.1002/em.21824.
- [58] Yan-Hong H, Jing L, Hong L, Shan-Shan H, Yan L, Ju L. Association between alcohol consumption and the risk of ovarian cancer: a meta-analysis of prospective observational studies. BMC Public Health 2015;15:223.

- 413           doi:10.1186/s12889-015-1355-8.
- 414   [59]   Orywal K, Jelski W, Zdrodowski M, Szmitkowski M. The activity of class I, II,  
415           III and IV alcohol dehydrogenase isoenzymes and aldehyde dehydrogenase in  
416           ovarian cancer and ovarian cysts. Adv Med Sci 2013;58:19–23. doi:10.2478/ams-  
417           2013-0012.
- 418   [60]   Tatone C, Eichenlaub-Ritter U, Amicarelli F. Dicarbonyl stress and glyoxalases  
419           in ovarian function. Biochem Soc Trans 2014;42:433–8.  
420           doi:10.1042/BST20140023.
- 421   [61]   Chaplen FW, Fahl WE, Cameron DC. Evidence of high levels of methylglyoxal  
422           in cultured Chinese hamster ovary cells. Proc Natl Acad Sci U S A  
423           1998;95:5533–8.
- 424   [62]   Tucker JD, Taylor RT, Christensen ML, Strout CL, Hanna ML, Carrano A V.  
425           Cytogenetic response to 1,2-dicarbonyls and hydrogen peroxide in Chinese  
426           hamster ovary AUXB1 cells and human peripheral lymphocytes. Mutat Res  
427           Toxicol 1989;224:269–79. doi:10.1016/0165-1218(89)90166-3.
- 428   [63]   Rutkowska AZ, Diamanti-Kandarakis E. Polycystic ovary syndrome and  
429           environmental toxins. Fertil Steril 2016;106:948–58.  
430           doi:10.1016/j.fertnstert.2016.08.031.
- 431   [64]   Rutkowska AZ, Diamanti-Kandarakis E. Do Advanced Glycation End Products  
432           (AGEs) Contribute to the Comorbidities of Polycystic Ovary Syndrome (PCOS)?  
433           Curr Pharm Des 2016.
- 434   [65]   Zhang J, Zhang Y, Liu H, Bai H, Wang Y, Jiang C, et al. Antioxidant properties  
435           of high-density lipoproteins are impaired in women with polycystic ovary

- 436 syndrome. Fertil Steril 2015;103:1346–54. doi:10.1016/j.fertnstert.2015.02.024.
- 437 [66] Iborra A, Palacio JR, Martínez P. Oxidative stress and autoimmune response in  
438 the infertile woman. Chem Immunol Allergy 2005;88:150–62.  
439 doi:10.1159/000087832.
- 440 [67] Murri M, Luque-ramírez M, Insenser M, Ojeda-ojeda M, Escobar-morreale HF.  
441 Circulating markers of oxidative stress and polycystic ovary syndrome (pcos): A  
442 systematic review and meta-analysis. Hum Reprod Update 2013;19:268–88.  
443 doi:10.1093/humupd/dms059.
- 444 [68] Ilie IR, Georgescu CE. Polycystic Ovary Syndrome-Epigenetic Mechanisms and  
445 Aberrant MicroRNA. Adv. Clin. Chem., vol. 71, 2015, p. 25–45.  
446 doi:10.1016/bs.acc.2015.06.001.
- 447 [69] Xu N, Kwon S, Abbott DH, Geller DH, Dumesic DA, Azziz R, et al. Epigenetic  
448 mechanism underlying the development of polycystic ovary syndrome (PCOS)-  
449 like phenotypes in prenatally androgenized rhesus monkeys. PLoS One  
450 2011;6:e27286. doi:10.1371/journal.pone.0027286.
- 451 [70] Braem MG, Schouten LJ, Peeters PH, van den Brandt PA, Onland-Moret NC.  
452 Genetic susceptibility to sporadic ovarian cancer: a systematic review. Biochim  
453 Biophys Acta 2011;1816:132–46. doi:10.1016/j.bbcan.2011.05.002.
- 454 [71] Toss A, Tomasello C, Razzaboni E, Contu G, Grandi G, Cagnacci A, et al.  
455 Hereditary Ovarian Cancer: Not Only BRCA 1 and 2 Genes. Biomed Res Int  
456 2015;2015:341723. doi:10.1155/2015/341723.
- 457 [72] Liu X, Gao Y, Zhao B, Li X, Lu YI, Zhang J, et al. Discovery of microarray-  
458 identified genes associated with ovarian cancer progression. Int J Oncol

459           2015;46:2467–78. doi:10.3892/ijo.2015.2971.

460   [73]   Boffetta P, Hashibe M. Alcohol and cancer. *Lancet Oncol* 2006;7:149–56.

461           doi:10.1016/S1470-2045(06)70577-0.

462

463

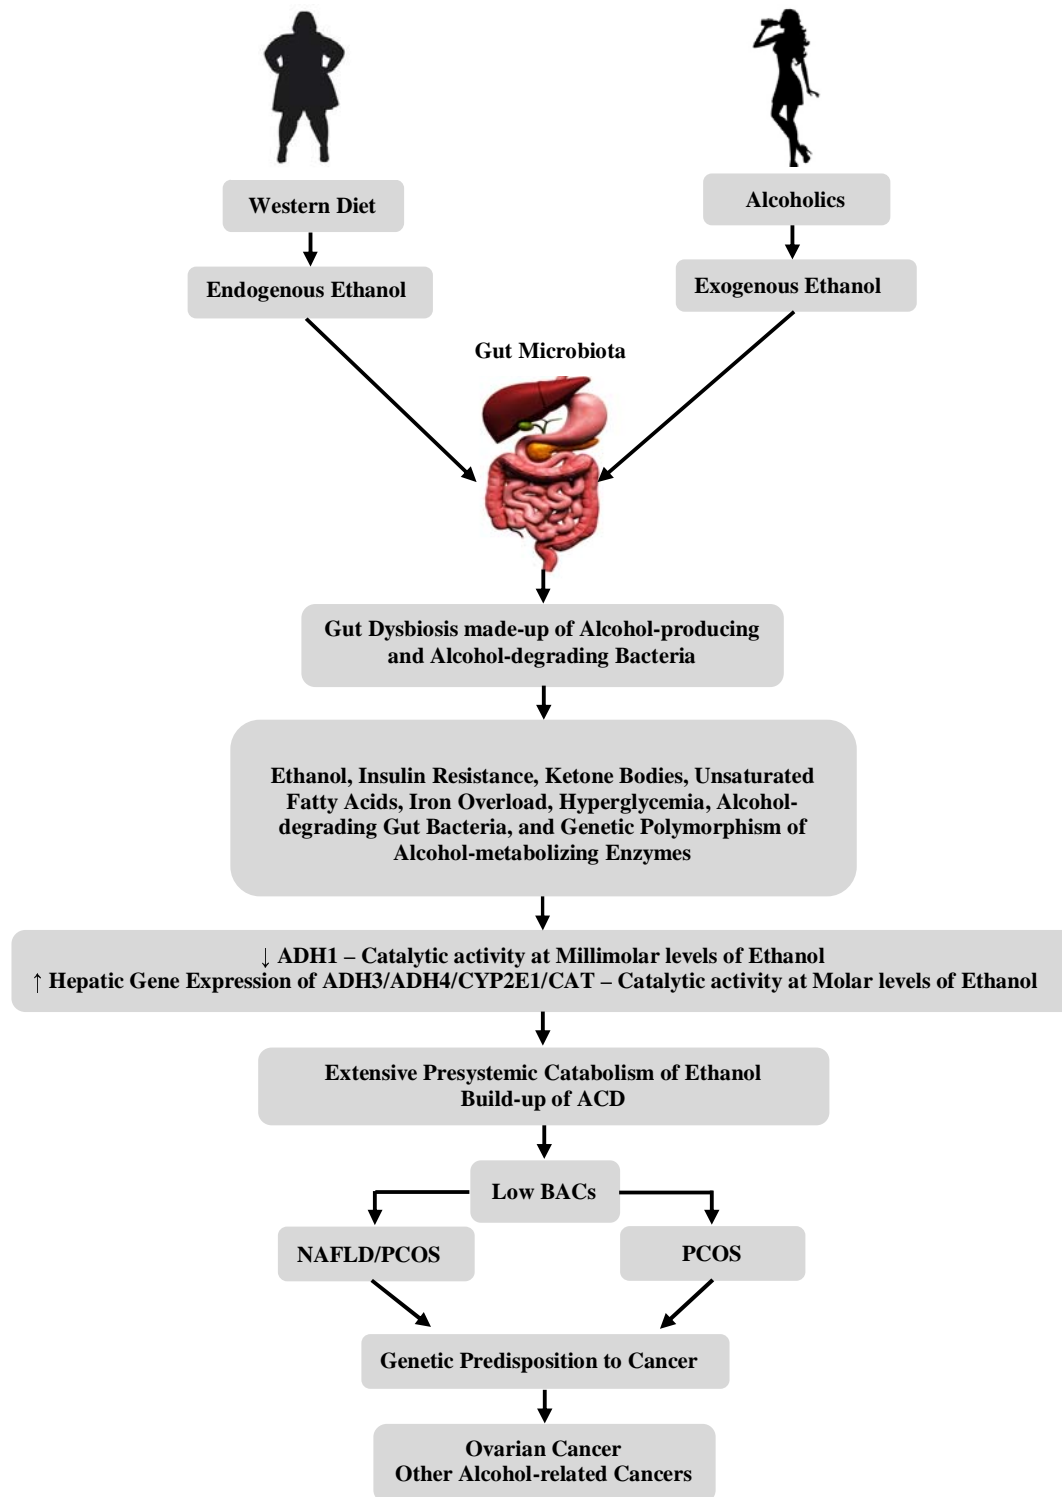

**Figure 1. Evidence that NAFLD/PCOS patients metabolize ethanol similarly to Alcohol-tolerant individuals.** Chronic exposure either to endogenous or exogenous high ethanol concentrations leads to a gut dysbiosis made-up of alcohol-producing and –degrading organisms. Then, a number of metabolic alterations switch alcohol metabolism from milligram

scale to hundreds of grams per day. This extensive presystemic clearance of ethanol causes ACD build-up, which in turn leads to the consistently low BACs. Lastly, in genetically predisposed women carcinogenic ACD can lead to ovarian cancer and other alcohol-related neoplasms. Km = Michaelis Constant; ADH = Alcohol dehydrogenase; CYP2E1 = Cytochrome P-450 2-E1; CAT = Catalase; EAPCOS = Endogenous Alcoholic Polycystic Ovary Syndrome; PCOS = Polycystic Ovary Syndrome; ACD = Acetaldehyde;
